# Supplementary material
Source: Springer Nature journal article supplement (https://www.springermedizin.de/resource/supplementary/12978_2011_117_MOESM1_ESM.pdf/9602884)
Supplement: MOESM1 [file 9602884]

## A. Communication

-within families (n= 13)  
to health providers (n=25)  
-within health facilities  
(n=16)

-family circumstances (n=14)  
-physical (n=27)  
-health seeking behaviour (n=24)  
-cultural beliefs and practices  
(n=15)

## B. Client high risk

Factors contributing to  
maternal deaths  
(n=381)

## C. Resources

-family (n=28)  
-health services (n=48)

## D. Case Management

-diagnosis (n=38)  
-supervision (n=45)  
-delays (n=36)  
-treatment (n=52)
